# Supplementary material for: Novel triphenylamine-containing ambipolar polyimides with pendant anthraquinone moiety for polymeric memory device, electrochromic and gas separation applications
Source: Royal Society of Chemistry journal article supplement (doi:10.1039/c2jm33266c), 2012-01-01
Supplement: c2jm33266c.pdf [file c2jm33266c.pdf]

## Supporting Information

### Novel Triphenylamine-Containing Ambipolar Polyimides with Pendant Anthraquinone Moiety for Polymeric Memory Device, Electrochromic and Gas Separation Applications

Yi-Cheng Hu,<sup>1</sup> Chih-Jung Chen,<sup>1</sup> Hung-Ju Yen,<sup>1</sup> Kun-Ying Lin,<sup>1</sup> Jui-Ming Yeh,<sup>2</sup>  
Wen-Chang Chen,<sup>1,3</sup> and Guey-Sheng Liou<sup>1\*</sup>

<sup>1</sup>*Institute of Polymer Science and Engineering, National Taiwan University, 1 Roosevelt Road, 4th Sec., Taipei 10617, Taiwan*

<sup>2</sup>*Department of Chemistry and Center for Nanotechnology and R&D Center for Membrane Technology, Chung-Yuan Christian University, Chung Li 32023, Taiwan*

<sup>3</sup>*Department of Chemical Engineering, National Taiwan University, 1 Roosevelt Road,  
4th Sec., Taipei 10617, Taiwan*

\* Corresponding author. E-mail: [gsliou@ntu.edu.tw](mailto:gsliou@ntu.edu.tw)

#### List of Contents for Supplementary Material:

|                                                                                                                                                                                                                                                           |             |
|-----------------------------------------------------------------------------------------------------------------------------------------------------------------------------------------------------------------------------------------------------------|-------------|
| <b>Figure S1.</b> IR spectra of AQ-6FPI.....                                                                                                                                                                                                              | <u>SI-2</u> |
| <b>Figure S2.</b> TGA thermograms of polyimides AQ-6FPI, AQ-DSPI, OAQ-6FPI, and OAQ-6FPI.....                                                                                                                                                             | <u>SI-3</u> |
| <b>Figure S3.</b> Cyclic voltammetric diagrams of polyimides AQ-DSPI and OAQ-DSPI films on an ITO-coated glass substrate over cyclic scans in 0.1 M TBAP/CH <sub>3</sub> CN for oxidation, in 0.1 M TBAP/DMF for reduction at a scan rate of 50 mV/s..... | <u>SI-4</u> |

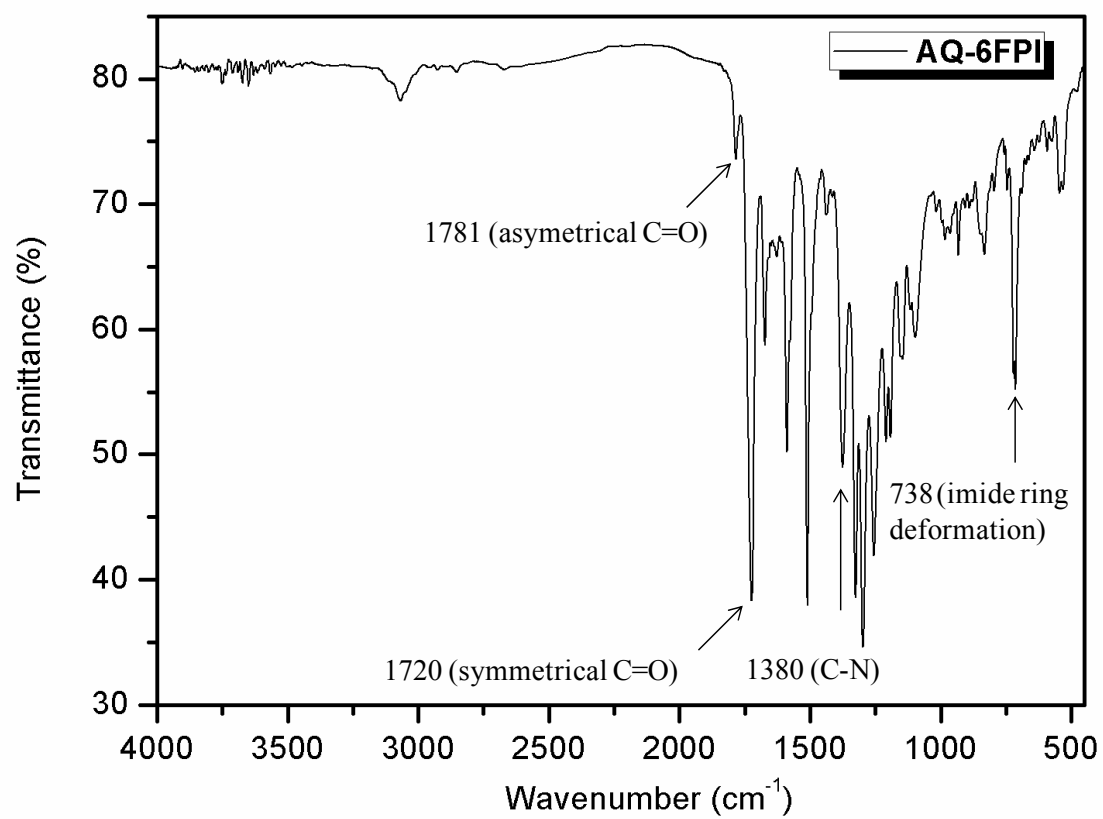

**Figure S1.** IR spectra of polyimide AQ-6FPI

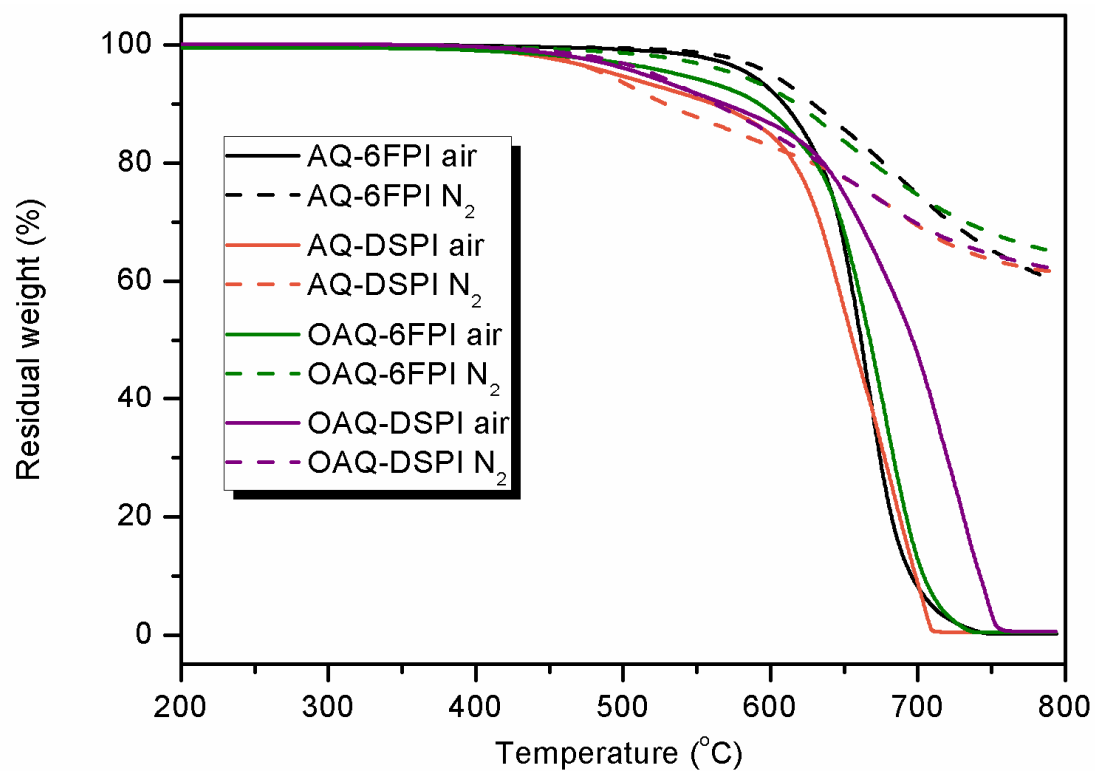

**Figure S2.** TGA thermograms of polyimides AQ-6FPI, AQ-DSPI, OAQ-6FPI, and OAQ-DSPI.

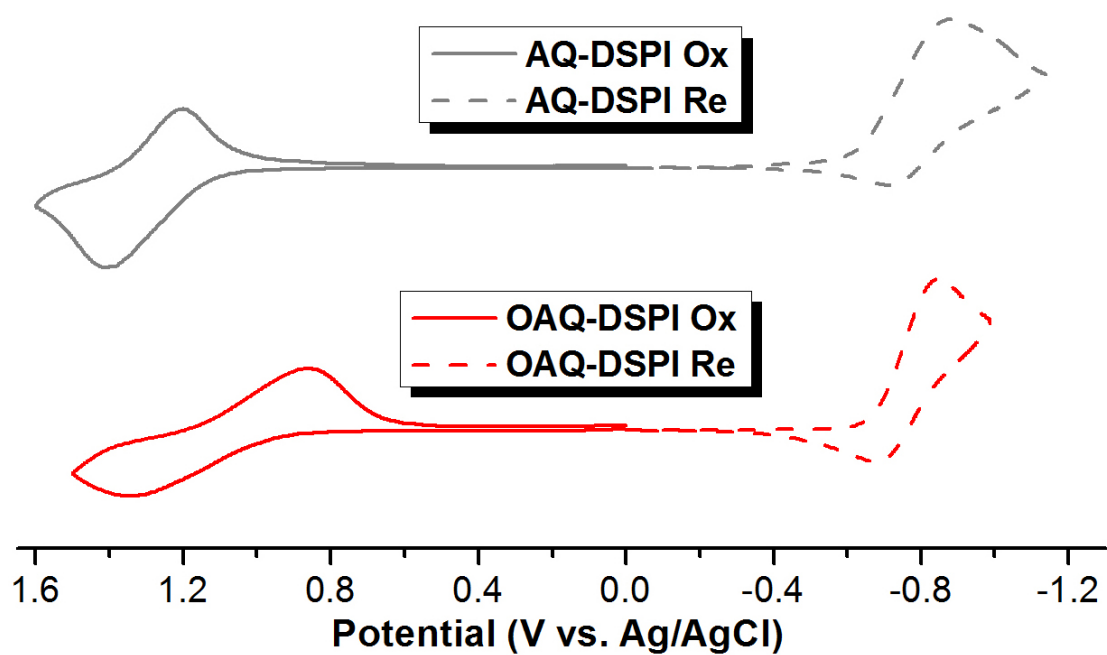

**Figure S3.** Cyclic voltammetric diagrams of polyimides **AQ-DSPI** and **OAQ-DSPI** films on an ITO-coated glass substrate over cyclic scans in 0.1 M TBAP/CH<sub>3</sub>CN for oxidation, in 0.1 M TBAP/DMF for reduction at a scan rate of 50 mV/s.
